# Supplementary material
Source: Springer Nature journal article supplement (https://www.springermedizin.de/resource/supplementary/12906_2011_531_MOESM1_ESM.pdf/9520236)

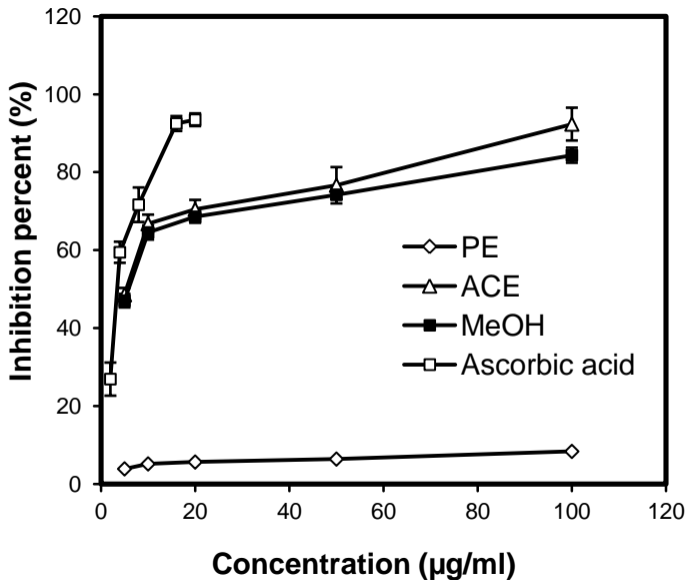

Supplement: MOESM1 [file 9520236]
